# Supplementary material for: Water-Soluble Extract from Actinidia arguta (Siebold & Zucc.) Planch. ex Miq. and Perilla frutescens (L.) Britton, ACTPER, Ameliorates a Dry Skin-Induced Itch in a Mice Model and Promotes Filaggrin Expression by Activating the AhR Signaling in HaCaT Cells
Source: PubMed Central journal article supplement (PMC6627490; doi:10.3390/nu11061366), 2019-06-18
Supplement: nutrients-11-01366-s001.pdf [file nutrients-11-01366-s001.pdf]

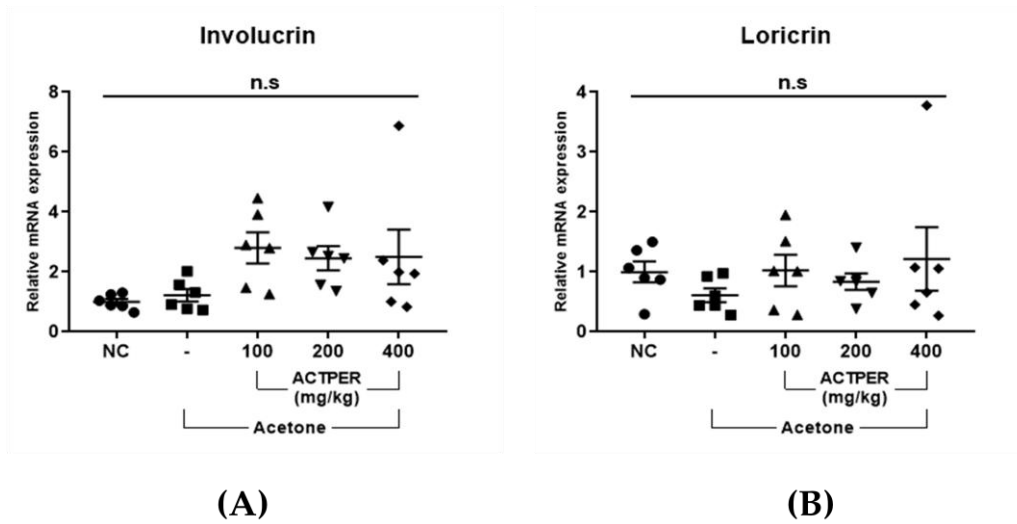

**Figure S1.** ACTPER does not regulate the expression of involucrin and loricrin in acetone-treated mice back skin. RNA levels of **(A)** involucrin and **(B)** loricrin in mice back skin.  $n = 6$  per group. All data are shown as mean  $\pm$  S.E.M.

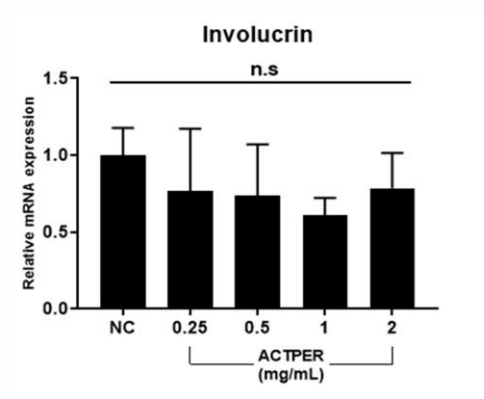

(A)

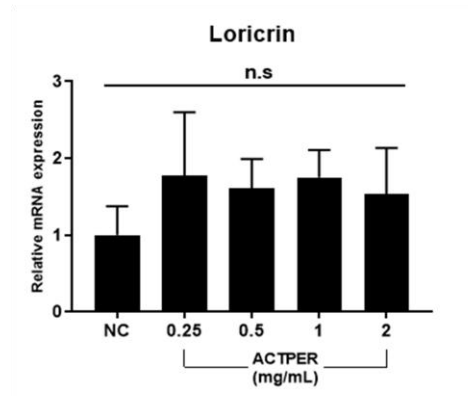

(B)

**Figure S2.** ACTPER does not promote the expression of involucrin and loricrin in HaCaT cells. Changes in the RNA level of (A) involucrin and (B) loricrin. Values represent the mean  $\pm$  S.E.M. of three independent experiments.
